# Supplementary material for: Cell-specific cross-talk proteomics reveals cathepsin B signaling as a driver of glioblastoma malignancy near the subventricular zone
Source: PubMed Central journal article supplement — Sci Adv. 2024 Aug 7;10(32):eadn1607. doi: 10.1126/sciadv.adn1607 (PMC11305394; doi:10.1126/sciadv.adn1607), 2024-08-07
Supplement: sciadv.adn1607_sm.pdf [file sciadv.adn1607_sm.pdf]

Supplementary Materials for

**Cell-specific cross-talk proteomics reveals cathepsin B signaling as a driver of glioblastoma malignancy near the subventricular zone**

Emily S. Norton *et al.*

Corresponding author: Hugo Guerrero-Cázares, [guerrero-cazares.hugo@mayo.edu](mailto:guerrero-cazares.hugo@mayo.edu)

*Sci. Adv.* **10**, eadn1607 (2024)  
DOI: 10.1126/sciadv.adn1607

**The PDF file includes:**

Figs. S1 to S4  
Legends for tables S1 and S2  
Table S3

**Other Supplementary Material for this manuscript includes the following:**

Tables S1 and S2

# Supplementary Figure 1

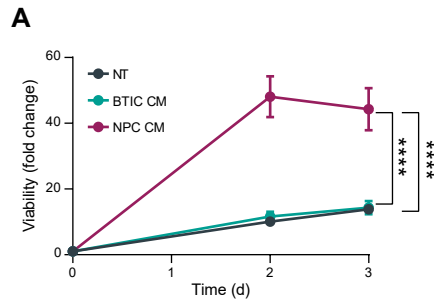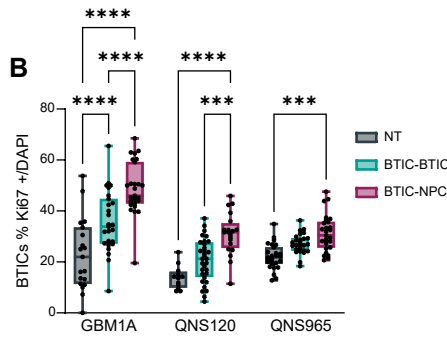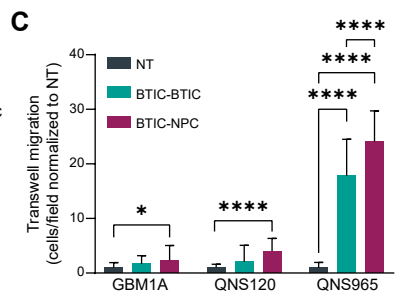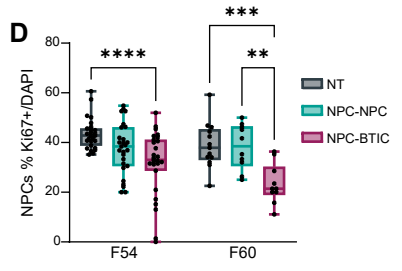

## In vivo

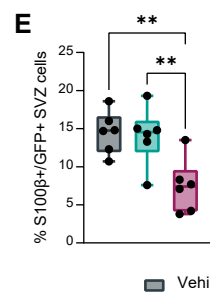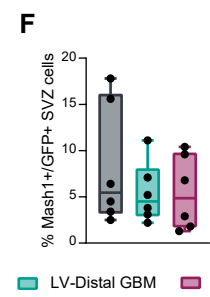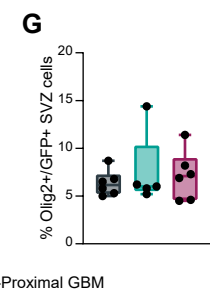

### **Supplementary Figure 1: Related to main Figure 1.**

(A) Viability assay over time of BTICs treated with conditioned medium from themselves or hfNPCs. Data tested with two-way ANOVA with Tukey multiple comparisons. (B) Proliferation assay indicating percentage of Ki67+ BTICs when co-cultured with themselves or hfNPCs for 48h. Data tested with two-way ANOVA with Šídák's multiple comparisons test. (C) Transwell migration assay of BTICs co-cultured with themselves or hfNPCs for 24h. Compared to NT conditions. Data tested with two-way ANOVA with Šídák's multiple comparisons test. (D) Proliferation assay indicating percentage of Ki67+ hfNPCs when co-cultured with themselves or BTICs for 48h. Compared to NT conditions. Data tested with two-way ANOVA with Tukey multiple comparisons. (E) Percentage quantifications of GFP+ cells in the SVZ that are S100β+ (n = 5-6 biological replicates). Data tested with ordinary one-way ANOVA with Holm-Šídák's multiple comparisons test. (F) Percentage quantifications of GFP+ cells in the SVZ that are Mash1+ (n = 5-6 biological replicates). (G) Percentage quantifications of GFP+ cells in the SVZ that are Olig2+ (n = 5-6 biological replicates). Data represented as median ± maximum/ minimum (box and whisker) or mean ± standard deviation (line graphs, bar charts), p < 0.05 \*, p < 0.01 \*\*, p < 0.001 \*\*\*, p < 0.0001 \*\*\*\*.

## Supplementary Figure 2

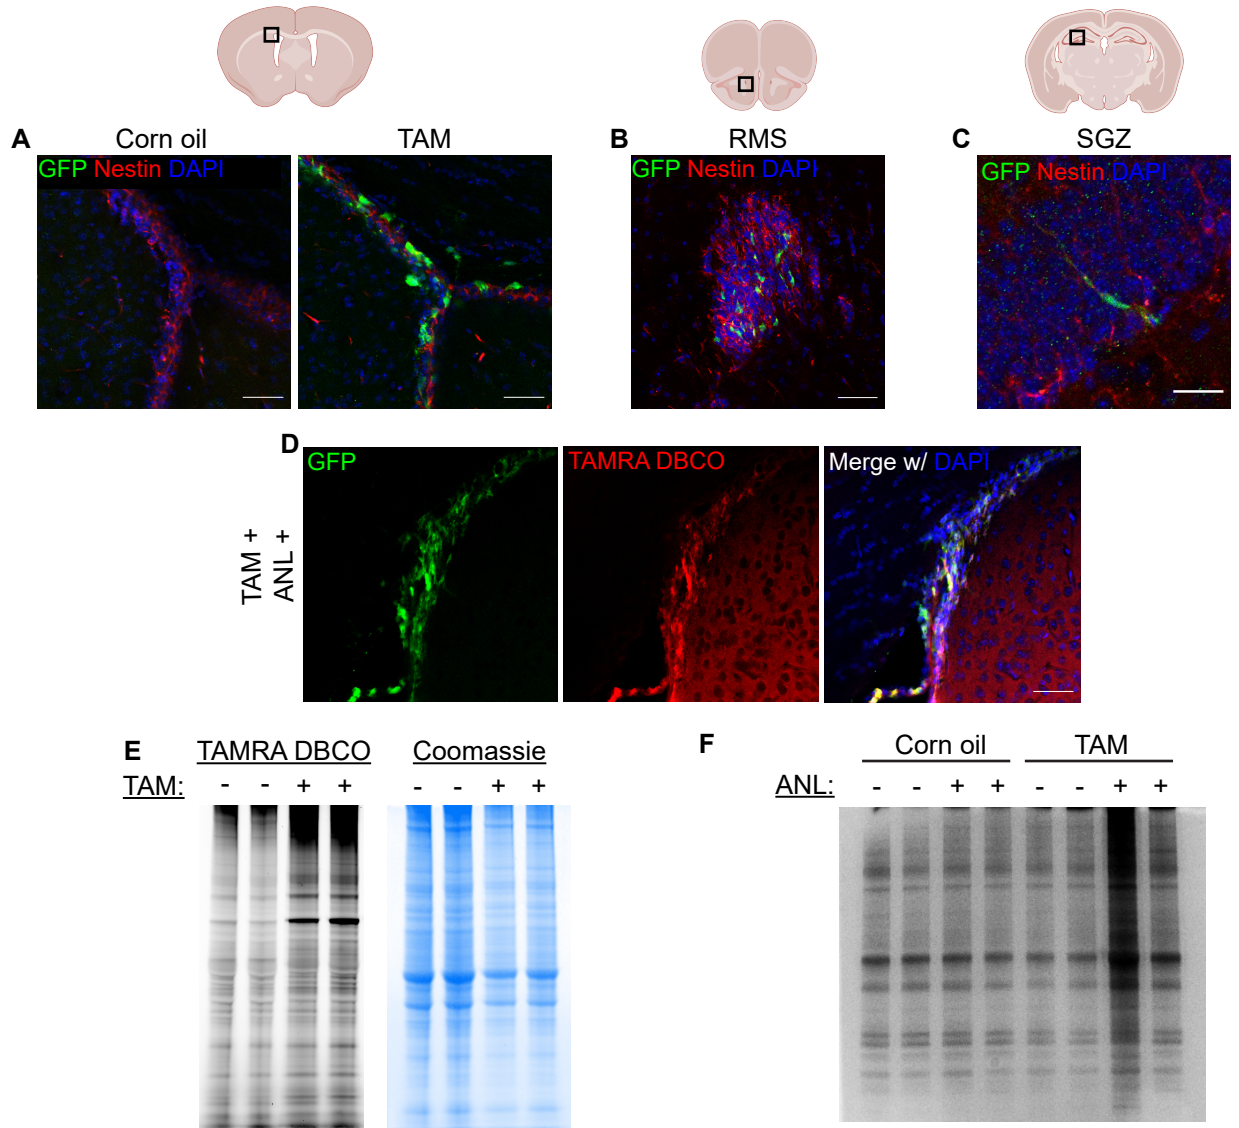

**Supplementary Figure 2: Nes-MetRS\* mice effectively express GFP and MetRS\* in NSCs when activated.**

(A) IHC showing TAM-inducible GFP expression in Nestin+ SVZ cells.

Scale bar = 50  $\mu$ m. Schematic created with Biorender.com. (B) IHC showing GFP expression in rostral migratory stream (RMS). Scale bar = 50  $\mu$ m. Schematic created with Biorender.com. (C) IHC showing GFP expression in subgranular zone (SGZ) of hippocampus. Scale bar = 25  $\mu$ m. Schematic created with Biorender.com. (D) IHC showing TAMRA DBCO co-localization to GFP+ cells in the SVZ. Scale bar = 50  $\mu$ m. (E) Gel indicating increased TAMRA DBCO incorporation into SVZ lysate following TAM induction of NSCs. (F) Silver stain of lysate immunoprecipitation showing pulldown enrichment in animals receiving both TAM and ANL.

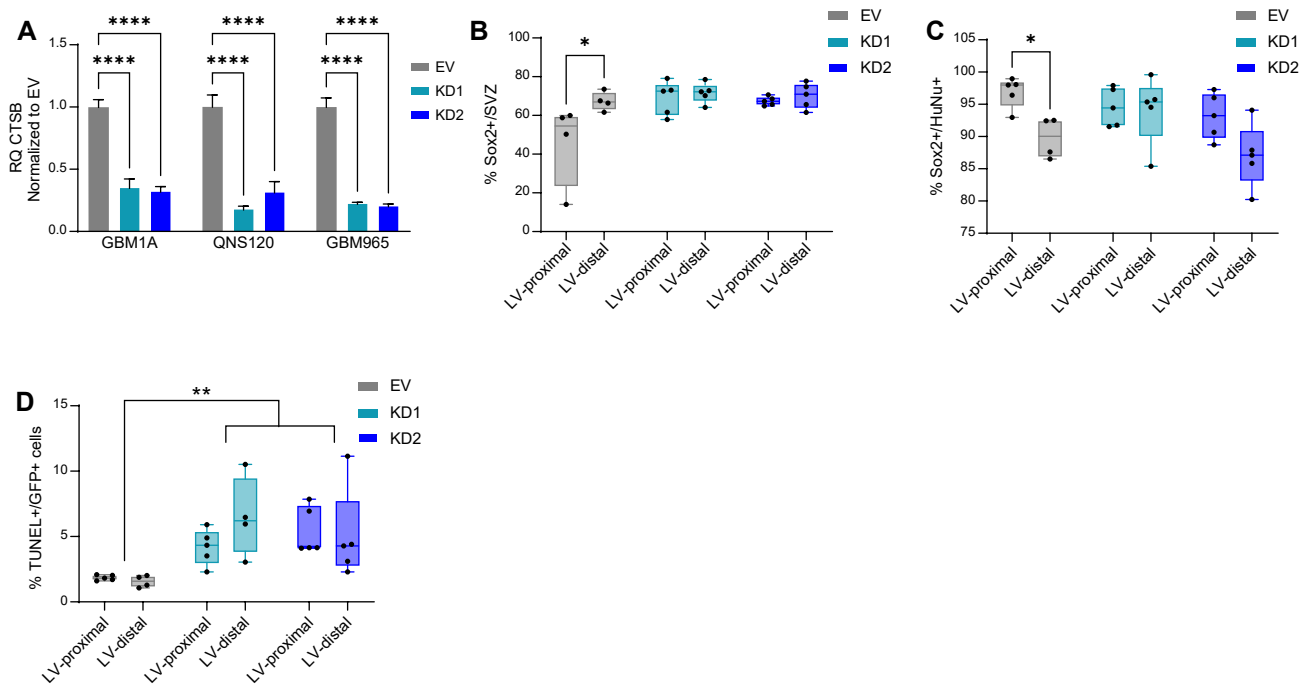

**Supplementary Figure 3**

### **Supplementary Figure 3: Related to main Figure 5.**

(A) RT-qPCR of CTSC expression in BTIC lines transduced with EV or CTSC KD hairpins (n = 3 technical replicates). Data was tested with one-way ANOVA with Tukey multiple comparisons. (B) Percentage of Sox2+ cells in the SVZ in the presence of EV or KD shRNA GBM1A tumors proximal or distal to LV (n = 4-5 biological replicates). Data was tested with two-way ANOVA with Šídák's multiple comparisons test. (C) Percentage of Sox2+ cells in EV or KD shRNA GBM1A tumors proximal or distal to LV (n = 4-5 biological replicates). Data was tested with two-way ANOVA with Šídák's multiple comparisons test. (D) Percentage of TUNEL+ cells in EV or KD shRNA GBM1A tumors proximal or distal to LV (n = 4-5 biological replicates). Data was tested with two-way ANOVA with Šídák's multiple comparisons test. Data represented as median ± maximum/minimum (box and whisker) or mean ± standard deviation (bar chart), p < 0.05 \*, p < 0.01 \*\*, p < 0.001 \*\*\*, p < 0.0001 \*\*\*\*.

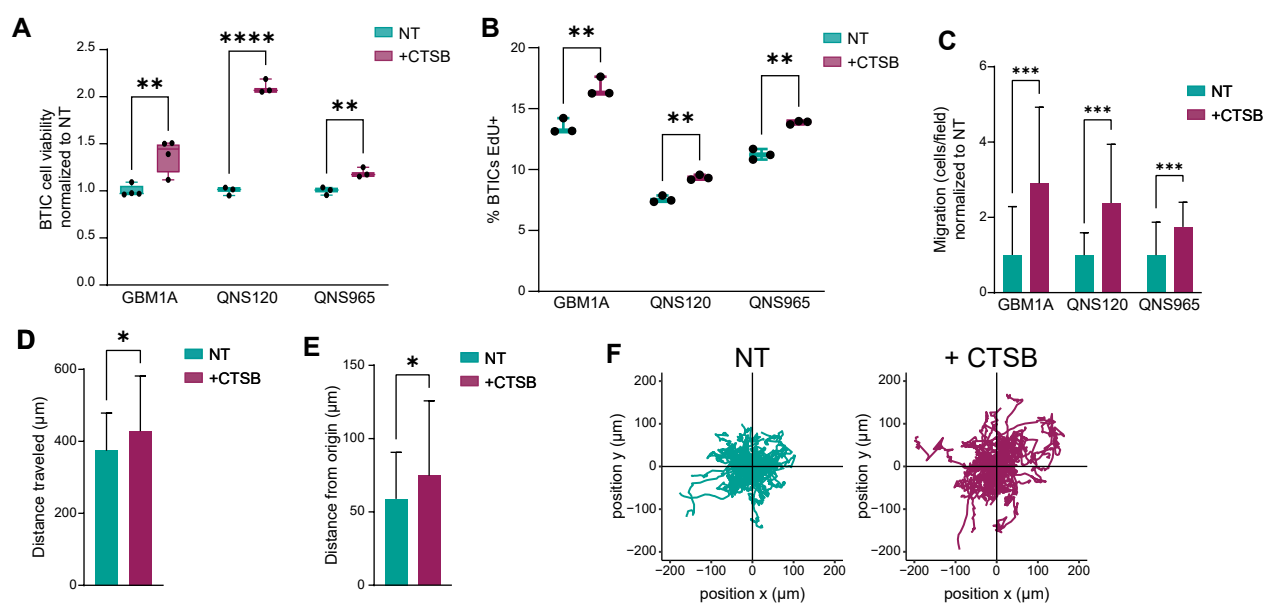

**Supplementary Figure 4**



#### **Supplementary Figure 4: Soluble CTSB contributes to malignancy-associated phenotypes in BTICs**

(A) Cell viability measurements for NT and + recombinant CTSB at 48h. Data was tested with multiple unpaired t-tests with Benjamini FDR. (B) Proliferation assay indicating percentage of EdU+ cells in NT and + recombinant CTSB. Data was tested with multiple unpaired t-tests with Benjamini FDR. (C) Transwell migration of NT and + recombinant CTSB. Data was tested with multiple unpaired t-tests with Benjamini FDR. (D) Total distance traveled by NT and + recombinant CTSB in timelapse migration. Data tested with two-tailed unpaired t-test. (E) Distance from origin traveled by NT and + recombinant CTSB in timelapse migration. Data tested with two-tailed unpaired t-test. (F) Representative plots of migration from origin for NT and + recombinant CTSB in BTIC line QNS120. Data represented as median  $\pm$  maximum/minimum (box and whisker) or mean  $\pm$  standard deviation (bar chart),  $p < 0.05$  \*,  $p < 0.01$  \*\*,  $p < 0.001$  \*\*\*,  $p < 0.0001$  \*\*\*\*.

**Supplemental Table 1:** gProfiler SVZ proteomics GO and KEGG. Table indicating the dataset source, the comparison to LV-proximal GBM group, the term name, the term id, the adjusted p-value, the negative log of the adjusted p-value, the term size, the query size, the number of intersecting proteins with the term, and the identities of the intersecting proteins from the SVZ proteomics analysis.

**Supplemental Table 2:** gProfiler BTIC proteomics GO and KEGG. Table indicating the dataset source, the term name, the term id, the adjusted p-value, the negative log of the adjusted p-value, the term size, the query size, the number of intersecting proteins with the term, the percent of significant proteins in the term, the effective domain size, and the identities of the intersecting proteins from the co-culture proteomics analysis.

**Supplementary Table 3: Patient information for intraoperative specimen collection**

| <b>Patient Sample ID</b> | <b>Primary or recurrent</b> | <b>Tumor diagnosis</b> | <b>Extent of Resection</b> | <b>Age at Surgery</b> | <b>Sex</b> | <b>MGMT Promoter Methylation</b> | <b>Other mutations</b>                                                              |
|--------------------------|-----------------------------|------------------------|----------------------------|-----------------------|------------|----------------------------------|-------------------------------------------------------------------------------------|
| <b>QNS484b</b>           | Recurrent                   | GBM                    | Gross Total                | 68                    | Male       | Positive                         | P53 negative<br>ATRX retained                                                       |
| <b>QNS669</b>            | Primary                     | GBM                    | Sub-total                  | 81                    | Male       | Negative                         | P53 positive<br>ATRX Retained                                                       |
| <b>QNS679</b>            | Primary                     | GBM                    | Sub-total                  | 56                    | Female     | Positive                         | ATRX retained<br>PTEN mutation positive<br>TERTp mutation positive<br>CDKN2A/B loss |
| <b>QNS690</b>            | Primary                     | GBM                    | Sub-total                  | 70                    | Male       | Negative                         | ATRX retained<br>P53 positive                                                       |
| <b>QNS783</b>            | Primary                     | GBM                    | Sub-total                  | 67                    | Male       | Negative                         | TERTp mutation positive<br>PTEN mutation positive                                   |
| <b>QNS794</b>            | Primary                     | GBM                    | Sub-total                  | 52                    | Female     | Positive                         | ATRX retained<br>P53 positive                                                       |
| <b>QNS891</b>            | Primary                     | GBM                    | Sub-total                  | 58                    | Male       | Negative                         | ATRX retained<br>P53 positive                                                       |
| <b>QNS893</b>            | Primary                     | GBM                    | Sub-total                  | 71                    | Male       | Negative                         | ATRX retained<br>P53 positive                                                       |

**Supplemental Table 3:** Patient information for intraoperative sample collection. Table indicating the sample ID, whether the tumor was primary or recurrent, the tumor diagnosis from pathology, the extent of resection, the age at surgery, the biological sex, the MGMT promoter methylation status, and other mutations detected in the tumor.
